# Supplementary material for: Hemoglobin, albumin, lymphocyte, and platelet (HALP) score: A risk prediction tool for incidence and mortality in diabetic kidney disease patients with type 2 diabetes
Source: Research Square preprint supplement (doi:10.21203/rs.3.rs-5373438/v1), 2024-12-18
Supplement: Supplementary file 1 [file 99a13ae8e3b9b5547994323a.xlsx]

## Sheet: Supplementary Table Content
Supplementary Table Content
Supplementary Table 1—The list of prescription NSAIDs examined in this study and the weighted frequencies.
Supplementary Table 2—Baseline characteristics of NSAIDs use in different HALP score groups.
Supplementary Table 3—The missing number and rate of covariates of HALP score.
Supplementary Table 4—Spearman correlation between HALP score and baseline data.
Supplementary Table 5—Univariate logistics regression analysis of the association between HALP score and diabetic kidney disease.
Supplementary Table 6—Threshold effect analysis of HALP score on diabetic kidney disease in type 2 diabetes patients.
Supplementary Table 7—Association of four components of HALP score and Diabetic kidney disease in NHANES.(continuous variables)
Supplementary Table 8—Association of four components of HALP score and Diabetic kidney disease in Southwest China.(continuous variables)
Supplementary Table 9—Association of four components of HALP score and Diabetic kidney disease in NHANES.(categorical variables)
Supplementary Table 10—Association of four components of HALP score and Diabetic kidney disease in Southwest China.(categorical variables)
Supplementary Table 11—Univariate Cox analysis of adverse outcomes in diabetic kidney disease among type 2 diabetes patients.
Supplementary Table 12—Threshold effect analysis of HALP score on adverse outcomes in diabetic kidney disease among type 2 diabetes patients.
Supplementary Table 13—Subgroup analysis of association of HALP score with diabetic kidney disease among type 2 diabetes patients in Southwest China.(Considering the factors of the COVID-19 pandemic in the Southwest China)
Supplementary Table 14—Univariate logistics regression analysis of the association between HALP score and diabetic kidney disease among type 2 diabetes patients.(Considering the factors of the COVID-19 pandemic in the Southwest China)
Supplementary Table 15—Multivariable logistics regression analysis of the association between HALP score and diabetic kidney disease among type 2 diabetes patients.(Considering the factors of the COVID-19 pandemic in the Southwest China)
Supplementary Table 16—Univariate Cox analysis of adverse outcomes in patients with diabetic kidney disease among type 2 diabetes .(excluding cardiovascular risk factors at baseline)
Supplementary Table 17—Multivariate Cox analysis of cardiovascular death in patients with diabetic kidney disease among type 2 diabetes .(excluding cardiovascular risk factors at baseline)
Supplementary Table 18—Multivariate Cox analysis of cerebrovascular death in patients with diabetic kidney disease among type 2 diabetes .(excluding cardiovascular risk factors at baseline)
Supplementary Table 19—Multivariate Cox analysis of all-cause mortality in patients with diabetic kidney disease after excluding participants whose cause-specific death occurred in the first year of follow-up.
Supplementary Table 20—Association of HALP score with risk of adverse outcomes when using the competing risk model.
Supplementary Table 21—Univariate Cox analysis of adverse outcomes in patients with diabetic kidney disease.(continuous HALP)
Supplementary Table 22—Multivariate Cox analysis of all-cause mortality in patients with diabetic kidney disease.(continuous HALP)
Supplementary Table 23—Multivariate Cox analysis of CVD-related mortality in patients with diabetic kidney disease.(continuous HALP)
Supplementary Table 24—Multivariate Cox analysis of malignancy-related mortality in patients with diabetic kidney disease.(continuous HALP)
Supplementary Table 25—Multivariate Cox analysis of cerebrovascular-related mortality in patients with diabetic kidney disease.(continuous HALP)
Supplementary Table 26—Univariate Cox analysis of adverse outcomes in patients with diabetic kidney disease.(continuous HALP)
Supplementary Table 27—Multivariate Cox analysis of CVD-related mortality in patients with diabetic kidney disease.(continuous HALP)
Supplementary Table 28—Multivariate Cox analysis of cerebrovascular-related mortality in patients with diabetic kidney disease.(continuous HALP)
Supplementary Table 29—Univariate logistics regression analysis of the association between HALP score and diabetic kidney disease.(continuous HALP)
Supplementary Table 30—Multivariable logistics regression analysis of the association between HALP score and diabetic kidney disease.(continuous HALP)
Supplementary Table 31—Univariate logistics regression analysis of the association between HALP score and diabetic kidney disease.(continuous HALP and Considering the factors of the COVID-19 pandemic in the Southwest China)
Supplementary Table 32—Multivariable logistics regression analysis of the association between HALP score and diabetic kidney disease.(continuous HALP and Considering the factors of the COVID-19 pandemic in the Southwest China)
Supplementary Table 33—Stratified analyses of the associations of HALP score wtih adverse outcomes among diabetic kidney disease in NHANES.

## Sheet: Supplementary Table 1-2
Supplementary Table 1—The list of prescription NSAIDs examined in this study and the weighted frequencies.
Generic Name	Prescription NSAIDS
	Frequency	Generic Name	Frequency
Celecoxib	28	Oxaprozin	0
Diclofenac	26	Piroxicam	2
Diflunisal	1	Meloxicam	1
Etodolac	1	Nabumetone	0
Fenoprofen	0	Salsalate	0
Flurbiprofen	1	Sulindac	1
Ibuprofen	3	Tolmetin	0
Indomethacin	1	Choline magnesium trisalicylate	1
Ketoprofen	0	Etoricoxib	0
Meclofenamete sodium	1	Valdecoxib	0
Mefanamic acid	0	Ketorolac	0
Naproxen	4	Rofecoxib	0
Supplementary Table 2—Baseline characteristics of NSAIDs use in different HALP score groups.
Variables	NHANES(n=7252)
	Total	HALP≤35.85	35.85<HALP<64.88	HALP≥64.88	p value
Dietary fiber intake,g/day	16.09±10.34	14.09±9.54	16.41±10.60	16.61±10.50	＜0.001
Anti-inflammatory drugs					0.037
Non-use of anti-inflammatory drugs	7183(99.00)	1812(25.00)	3576(49.30)	1795(24.80)
Use of anti-inflammatory drugs	69(1.00)	21(0.30)	40(0.60)	8(0.10)	0.873
Naproxen	4(5.80)	1(1.40)	2(2.90)	1(1.40)
Sulindac	1(1.40)	0	1(1.40)	0
Colchicine	3(4.30)	1(1.40)	3(4.30)	0
Diflunisal	1(1.40)	0	1(1.40)	0
Flurbiprofen	1(1.40)	0	1(1.40)	0
Meclofenamete sodium	1(1.40)	0	1(1.40)	0
Piroxicam	2(2.90)	1(1.40)	0	1(1.40)
Diclofenac	26(37.70）	11(15.9)	12(17.40)	3(4.30)
Etodolac	1(1.40)	0	1(1.40)	0
Choline magnesium trisalicylate	1(1.40)	0	1(1.40)	0
Celecoxib	28(40.60)	8(11.60)	17(24.60)	3(4.30)
Allcontinuous variables were presented asweighted mean and categorical variables were presented as weighted %.

## Sheet: Supplementary Table 3
Supplementary Table 3—The missing number and rate of covariates of HALP score.
Variables	NHANES(n=7252)					Southwest China(n=18498)
	All	HALP≤35.85	35.85<HALP<64.88	HALP≥64.88		All	HALP≤30.19	30.19<HALP<70.53	HALP≥70.53
Clinical characteristics
Age	0(0.00)	0(0.00)	0(0.00)	0(0.00)		0(0.00)	0(0.00)	0(0.00)	0(0.00)
Sex	0(0.00)	0(0.00)	0(0.00)	0(0.00)		0(0.00)	0(0.00)	0(0.00)	0(0.00)
Race	0(0.00)	0(0.00)	0(0.00)	0(0.00)		0(0.00)	0(0.00)	0(0.00)	0(0.00)
Drinking status	2516(34.70)	658(36.30)	1257(34.70)	53(36.30)		3472(0.19)	784(0.17)	1696(0.18)	992(0.21)
Smoking status	5923(81.70)	1463(80.70)	2945(81.20)	126(86.30)		3443(0.19)	775(0.17)	1686(0.18)	982(0.21)
SBP	746(10.30)	218(12.00)	357(9.80)	9(6.20)		4223(0.23)	1061(0.23)	2216(0.24)	946(0.20)
DBP	746(10.30)	218(12.00)	357(9.80)	9(6.20)		4195(0.23)	1051(0.23)	2207(0.24)	937(0.20)
BMI	186(2.60)	84(4.60)	75(2.10)	4(2.70)		1296(0.07)	691(0.15)	201(0.02)	404(0.09)
CKD	0(0.00)	0(0.00)	0(0.00)	0(0.00)		0(0.00)	0(0.00)	0(0.00)	0(0.00)
Laboratory data
HGB	0(0.00)	0(0.00)	0(0.00)	0(0.00)		0(0.00)	0(0.00)	0(0.00)	0(0.00)
ALB	0(0.00)	0(0.00)	0(0.00)	0(0.00)		0(0.00)	0(0.00)	0(0.00)	0(0.00)
LYM	0(0.00)	0(0.00)	0(0.00)	0(0.00)		0(0.00)	0(0.00)	0(0.00)	0(0.00)
PLT	0(0.00)	0(0.00)	0(0.00)	0(0.00)		0(0.00)	0(0.00)	0(0.00)	0(0.00)
GLU	5372(74.10)	1309(72.20)	2659(73.30)	116(79.50)		5128(0.28)	1205(0.26)	2571(0.28)	1352(0.29)
HbA1c	5927(81.70)	1465(80.80)	2947(81.30)	126(86.30)		3935(0.21)	1142(0.25)	1899(0.21)	894(0.19)
WBC	0(0.00)	0(0.00)	0(0.00)	0(0.00)		3699(0.20)	849(0.18)	1778(0.19)	1072(0.23)
SCR	0(0.00)	0(0.00)	0(0.00)	0(0.00)		651(0.04)	106(0.02)	262(0.03)	283(0.06)
UA	0(0.00)	0(0.00)	0(0.00)	0(0.00)		459(0.02)	83(0.02)	211(0.02)	165(0.04)
TG	3046(42.00)	673(37.10)	1502(41.40)	79(54.10)		3789(0.20)	1119(0.24)	1842(0.20)	828(0.18)
HDL-C	30(0.40)	5(0.30)	21(0.60)	1(0.70)		6475(0.35)	1779(0.38)	3077(0.33)	1619(0.35)
LDL-C	4162(57.40)	960(53.00)	2060(56.80)	99(67.80)		5889(0.32)	1732(0.37)	2915(0.32)	1242(0.27)
EOS	1329(18.30)	350(19.30)	681(18.80)	20(13.70)		2115(0.11)	689(0.15)	1022(0.11)	404(0.09)
NEU	1329(18.30)	350(19.30)	681(18.80)	20(13.70)		2542(0.14)	725(0.16)	1200(0.13)	617(0.13)
MON	1329(18.30)	350(19.30)	681(18.80)	20(13.70)		2095(0.11)	667(0.14)	1024(0.11)	404(0.09)
RBC	0(0.00)	0(0.00)	0(0.00)	0(0.00)		3009(0.17)	791(0.17)	1592(0.17)	626(0.14)
eGFR	0(0.00)	0(0.00)	0(0.00)	0(0.00)		651(0.20)	106(0.02)	262(0.03)	283(0.06)
UALB	4962(68.40)	1225(67.60)	2475(68.30)	104(71.20)
UACR	4962(68.40)	1225(67.60)	2475(68.30)	104(71.20)
UCR	287(4.00)	136(7.50)	116(3.20)	3(2.10)
NHANES, national health and nutrition examination survey; Southwest China, a multi-center cross-sectional study in southwest China; SBP, systolic blood pressure; DBP, diastolic blood pressure; BMI, body mass index; CKD, chronic kidney disease; HGB, hemoglobin; ALB, albumin; LYM, lymphocyte; PLT, platelet; Glu, glucose; HbA1c, glycated hemoglobin; WBC, white blood cell; SCR, serum creatinine; UA, …

## Sheet: Supplementary Table 4
Supplementary Table 4—Spearman correlation between HALP score and baseline data.
Variables	NHANES		Southwest China
	Correlation coefficient	p value	Correlation coefficient	p value
Age	-0.72	<0.001	-0.13	<0.001
SBP	-0.04	<0.001	-0.03	<0.001
DBP	0.1	<0.001	0.02	0.02
BMI	0.01	0.553	0.01	0.476
HGB	0.45	<0.001	0.35	<0.001
ALB	0.31	<0.001	0.16	<0.001
LYM	0.44	<0.001	0.05	<0.001
PLT	-0.39	<0.001	-0.38	<0.001
GLU	0.05	<0.001	-0.01	0.371
HbA1c	0.07	<0.001	-0.02	0.01
WBC	0.21	<0.001	-0.01	0.062
SCR	-0.11	<0.001	-0.01	0.3
UA	-0.02	0.115	0.03	<0.001
TG	0.07	<0.001	0.03	<0.001
HDL-C	-0.13	<0.001	-0.01	0.203
LDL-C	0.04	<0.001	0.01	0.143
EOS	0.05	<0.001	0.07	<0.001
NEU	0.02	<0.001	0.24	<0.001
MON	0.15	<0.001	0.1	<0.001
RBC	0.33	<0.001	0.01	0.161
eGFR	0.15	<0.001	0.07	<0.001
NHANES, national health and nutrition examination survey; Southwest China, a multi-center cross-sectional study in southwest China; SBP, systolic blood pressure; DBP, diastolic blood pressure; BMI, body mass index; CKD, chronic kidney disease; HGB, hemoglobin; ALB, albumin; LYM, lymphocyte; PLT, platelet; Glu, glucose; HbA1c, glycated hemoglobin; WBC, white blood cell; SCR, serum creatinine; UA, …

## Sheet: Supplementary Table 5
Supplementary Table 5—Univariate logistics regression analysis of the association between HALP score and diabetic kidney disease.
Characteristic	NHANES		Southwest China
	OR(95%CI)	p value	OR(95%CI)	p value
Age	1.068(1.063-1.073)	<0.001	0.993(0.990-0.995)	<0.001
Sex	1.151(1.045-1.268)	0.004	1.109(1.028-1.196)	0.007
Race
1	reference		reference
2	0.569(0.446-0.726)	<0.001	1.005(0.574-1.758)	0.987
3	1.539(1.349-1.757)	<0.001	1.681(0.748-3.778)	0.209
4	1.846(1.605-2.124)	<0.001	0.816(0.239-2.785)	0.745
5	0.718(0.575-0.896)	0.003	1.216(0.688-2.151)	0.501
Drinking status	1.373(1.245-1.515)	<0.001	1.099(1.011-1.194)	0.026
Smoking Status	1.088(0.987-1.199)	0.089	1.085(1.002-1.174)	0.045
SBP	1.020(1.018-1.022)	<0.001	1.002(1.001-1.002)	0.001
DBP	0.986(0.983-0.990)	<0.001	1.000(0.997-1.002)	0.757
BMI	0.991(0.984-0.998)	0.009	0.999(0.992-1.005)	0.01
HGB	0.969(0.965-0.972)	<0.001	0.995(0.994-0.996)	<0.001
ALB	0.889(0.877-0.902)	<0.001	0.997(0.996-0.999)	<0.001
LYM	0.887(0.837-0.940)	<0.001	0.951(0.903-1.001)	0.055
PLT	0.999(0.999-1.000)	0.039	1.001(1.000-1.001)	0.004
HbAlc	1.001(0.949-1.057)	0.959	0.992(0.988-0.995)	<0.001
WBC	1.015(0.994-1.037)	0.152	1.000(1.000-1.000)	0.111
SCR	1.002(1.001-1.002)	<0.001	1.020(1.018-1.022)	<0.001
UA	1.007(1.006-1.007)	<0.001	1.002(1.002-1.002)	<0.001
TG	1.065(1.036-1.095)	<0.001	0.999(0.994-1.003)	0.578
HDL-C	0.972(0.855-1.105)	0.66	0.994(0.987-1.001)	0.077
LDL-C	1.003(0.958-1.050)	0.911	0.997(0.991-1.002)	0.257
EOS	1.617(1.226-2.133)	<0.001	1.602(1.272-2.017)	<0.001
NEU	1.055(1.026-1.085)	<0.001	1.022(1.010-1.034)	<0.001
MON	2.116(1.671-2.678)	<0.001	1.252(1.068-1.466)	0.005
RBC	0.378(0.342-0.417)	<0.001	1.000(1.000-1.001)	0.408
eGFR	0.911(0.907-0.915)	<0.001	0.974(0.969-0.978)	<0.001
HALP	0.991(0.988-0.993)	<0.001	0.997(0.996-0.998)	<0.001
Note: NHANES, national health and nutrition examination survey; Southwest China, a multi-center cross-sectional study in southwest China; OR, odds ratios; 95%CI, 95% confidence interval;Race(NHANES):1(Mexican American people), 2(other Hispanic people), 3(non-Hispanic White people), 4(non-Hispanic Black people) and 5(multi-racial people); Race(Southwest China):1(the Han ethnic group), 2(the Tujia …

## Sheet: Supplementary Table 6
Supplementary Table 6—Threshold effect analysis of HALP score on diabetic kidney disease in type 2 diabetes patients.
		Adjusted HR (95% CI)	p value
NHANES
all
Fitting by standard lincar model	HALP	0.999(0.996-1.002)	0.5445
Fitting by two-piecewise linear model
	Inflection point of HALP	64.79
	HALP < 64.49	0.994(0.989-0.998)	0.0082
	HALP ≥ 64.49	0.999(0.997-1.002)	0.4653
	Log likelihood ratio		0.013
male
Fitting by standard lincar model	HALP	0.996(0.995-0.997)	<0.0001
Fitting by two-piecewise linear model
	Inflection point of HALP	70.92
	HALP < 70.92	0.985(0.982-0.989)	<0.0001
	HALP ≥ 70.92	0.997(0.995-0.998)	<0.0001
	Log likelihood ratio		0.014

## Sheet: Supplementary Table  7-10
Supplementary Table 7—Association of four components of HALP score and Diabetic kidney disease in NHANES.(continuous variables)
Components	Model 1			Model 2			Model 3
	OR (95% CI)	p value		OR (95% CI)	p value		OR (95% CI)	p value
HGB	0.969(0.965,0.972)	<0.001		0.971(0.967,0.975)	<0.001		0.971(0.967,0.974)	<0.001
ALB	0.885(0.872,0.899)	<0.001		0.885(0.872,0.899)	<0.001		0.887(0.874,0.901)	<0.001
LYM	0.887(0.837,0.940)	<0.001		1.00(0.954,1.049)	0.992		0.997(0.951,1.046)	0.912
PLT	0.999(0.999,1.000)	0.039		1.002(1.001,1.002)	<0.001		1.002(1.001,1.002)	<0.001
NHANES, national health and nutrition examination survey; HGB, hemoglobin; ALB, albumin; LYM, lymphocyte; PLT, platelet.
Model 1 adjusted for none
Model 2 adjusted for age and sex
Model 3 adjusted for age, sex, SBP, DBP, and BMI
Supplemental Table 8—Association of four components of HALP score and Diabetic kidney disease in Southwest China.(continuous variables)
Components	Model 1			Model 2			Model 3
	OR (95% CI)	p value		OR (95% CI)	p value		OR (95% CI)	p value
HGB	0.995(0.994,0.996)	<0.001		0.995(0.993,0.996)	<0.001		0.989(0.987,0.991)	<0.001
ALB	0.997(0.996,0.999)	<0.001		0.997(0.996,0.999)	<0.001		0.998(0.997,1.000)	0.012
LYM	0.950(0.903,1.001)	0.053		0.930(0.881,0.983)	0.01		0.940(0.884,0.999)	0.046
PLT	1.001(1.000,1.001)	0.004		1.001(1.00,1.001)	0.01		1.000(1.000,1.001)	0.237
Southwest China, a multi-center cross-sectional study in southwest China; HGB, hemoglobin; ALB, albumin; LYM, lymphocyte; PLT, platelet.
Model 1 adjusted for none
Model 2 adjusted for age and sex
Model 3 adjusted for age, sex, and Smoking status
Supplemental Table 9—Association of four components of HALP score and Diabetic kidney disease in NHANES.(categorical variables)
Components	Model 1			Model 2			Model 3
	OR (95% CI)	p value		OR (95% CI)	p value		OR (95% CI)	p value
HGB	0.669(0.640,0.700)	<0.001		0.701(0.665,0.738)	<0.001		0.668(0.631,0.707)	<0.001
ALB	0.713(0.683,0.745)	<0.001		0.711(0.678,0.745)	<0.001		0.732(0.696,0.770)	<0.001
LYM	0.842(0.805,0.880)	<0.001		0.956(0.910,1.004)	0.075		0.889(0.843,0.936)	<0.001
PLT	0.927(0.887,0.968)	<0.001		1.072(1.020,1.126)	0.006		1.003(0.953,1.058)	0.879
NHANES, national health and nutrition examination survey; HGB, hemoglobin; ALB, albumin; LYM, lymphocyte; PLT, platelet.
Model 1 adjusted for none
Model 2 adjusted for age and sex
Model 3 adjusted for age, sex, drinking status, smoking status, SBP, DBP, and race
Supplementary Table 10—Association of four components of HALP score and Diabetic kidney disease in Southwest China.(categorical variables)
Components	Model 1			Model 2			Model 3
	OR (95% CI)	p value		OR (95% CI)	p value		OR (95% CI)	p value
HGB	0.858(0.829,0.887)	<0.001		0.815(0.786,0.845)	<0.001		0.808(0.772,0.846)	<0.001
ALB	0.658(0.636,0.681)	<0.001		0.642(0.620,0.665)	<0.001		0.706(0.676,0.738)	<0.001
LYM	0.956(0.924,0.989)	0.009		0.941(0.909,0.974)	<0.001		0.958(0.917,1.000)	0.051
PLT	1.029(0.995,1.065)	0.094		1.023(0.998,1.059)	0.195		0.995(0.953,1.038)	0.803
Southwest China, a multi-center cross-sectional study in southwest China; HGB, hemoglobin; ALB, albumin; LYM, lymphocyte; PLT, platelet.
Model 1 adjusted for none.
Model 2 adjusted for age and sex.
Model 3 adjusted for age, sex, drinking status, smoking status, SBP and DBP.

## Sheet: Supplementary Table 11
Supplementary Table 11—Univariate Cox analysis of adverse outcomes in diabetic kidney disease among type 2 diabetes patients.
Variable	All-cause mortality		CVD-related mortality		Malignancy-related mortality		Cerebrovascular-related mortality
	HR(95%CI)	p value	HR(95%CI)	p value	HR(95%CI)	p value	HR(95%CI)	p value
Age	1.058(1.053-1.064)	<0.001	1.073(1.063-1.083)	<0.001	1.089(1.071-1.108)	<0.001	1.084(1.061-1.108)	<0.001
Sex	0.769(0.695-0.851)	<0.001	0.774(0.650-0.922)	0.004	0.680(0.507-0.913)	0.01	1.067(0.709-1.608)	0.755
Race	1.024(0.983-1.066)	0.255	1.013(0.945-1.086)	0.716	1.074(0.954-1.209)	0.238	1.048(0.894-1.229)	0.561
Drinking status	1.020(0.896-1.160)	0.77	0.983(0.763-1.267)	0.894	0.810(0.523-1.256)	0.347	0.863(0.463-1.607)	0.642
Smoking Status	0.873(0.753-1.014)	0.075	0.860(0.671-1.101)	0.231	0.525(0.335-0.823)	0.005	0.659(0.385-1.130)	0.13
SBP	1.007(1.005-1.009)	<0.001	1.009(1.006-1.013)	<0.001	1.010(1.005-1.016)	<0.001	1.016(1.009-1.024)	<0.001
DBP	0.992(0.989-0.995)	<0.001	0.991(0.986-0.996)	<0.001	0.994(0.985-1.003)	0.162	0.998(0.986-1.011)	0.756
BMI	0.983(0.975-0.990)	<0.001	0.976(0.963-0.990)	<0.001	0.963(0.941-0.986)	0.002	0.958(0.927-0.990)	0.01
Glu	1.000(0.990-1.009)	0.93	1.009(0.992-1.026)	0.29	1.020(0.993-1.048)	0.142	1.027(0.991-1.064)	0.142
HbAlc	1.012(0.958-1.069)	0.674	1.029(0.938-1.129)	0.674	1.083(0.932-1.260)	0.299	1.035(0.838-1.278)	0.751
WBC	1.028(1.008-1.049)	0.007	1.042(1.003-1.082)	0.032	1.056(1.008-1.106)	0.023	1.030(0.936-1.133)	0.544
SCR	1.134(1.099-1.169)	<0.001	1.113(1.055-1.173)	<0.001	1.038(0.924-1.164)	0.532	1.089(0.969-1.224)	0.151
UA	1.002(1.002-1.003)	<0.001	1.002(1.001-1.003)	<0.001	1.002(1.001-1.003)	0.004	1.002(1.000-1.004)	0.077
TG	1.011(0.989-1.035)	0.329	1.026(0.994-1.059)	0.115	1.076(0.995-1.164)	0.067	1.083(0.969-1.211)	0.162
HDL-C	0.918(0.804-1.049)	0.21	0.827(0.650-1.053)	0.123	1.132(0.780-1.643)	0.514	0.992(0.587-1.678)	0.977
LDL-C	1.002(0.957-1.050)	0.931	1.119(1.037-1.208)	0.004	1.059(0.924-1.214)	0.408	1.197(0.999-1.435)	0.052
EOS	1.138(0.834-1.553)	0.415	0.843(0.474-1.499)	0.561	0.636(0.239-1.689)	0.364	0.337(0.075-1.510)	0.155
NEU	1.038(1.008-1.069)	0.012	1.032(0.979-1.088)	0.244	0.996(0.909-1.090)	0.926	0.949(0.834-1.080)	0.429
MON	1.372(1.100-1.710)	0.005	1.430(0.998-2.048)	0.051	1.578(0.895-2.783)	0.115	1.287(0.557-2.975)	0.555
RBC	0.678(0.617-0.744)	<0.001	0.747(0.636-0.876)	<0.001	0.684(0.520-0.900)	0.007	0.834(0.575-1.210)	0.338
eGFR	0.981(0.979-0.983)	<0.001	0.980(0.976-0.984)	<0.001	0.984(0.978-0.990)	<0.001	0.982(0.973-0.990)	<0.001
ACR	1.000(1.000-1.000)	0.006	1.000(1.000-1.000)	0.599	1.000(1.000-1.000)	0.262	1.000(1.000-1.000)	0.039
HALP	0.854(0.794-0.919)	<0.001	0.846(0.747-0.959)	0.009	0.901(0.730-1.113)	0.333	0.739(0.554-0.986)	0.04
Note: HR, hazard ratios; 95%CI, 95% confidence interval; SBP, systolic blood pressure; DBP, diastolic blood pressure; BMI, body mass index; CKD, chronic kidney disease; HGB, hemoglobin; ALB, albumin; LYM, lymphocyte; PLT, platelet; Glu, glucose; HbA1c, glycated hemoglobin; WBC, white blood cell; SCR, serum creatinine; UA, uric acid; TG, triglyceride; HDL-C, high-density lipoprotein cholesterol; L…

## Sheet: Supplementary Table 12
Supplementary Table 12—Threshold effect analysis of HALP score on adverse outcomes in diabetic kidney disease among type 2 diabetes patients.
		Adjusted HR (95% CI)	p value
All-cause mortality
all
Fitting by standard lincar model	HALP	0.998(0.996-1.000)	0.0558
Fitting by two-piecewise linear model
	Inflection point of HALP	40.06
	HALP < 40.06	0.983(0.976-0.990)	<0.001
	HALP ≥ 40.06	1.000(0.998-1.001)	0.6205
	Log likelihood ratio		<0.001
age≥64
Fitting by standard lincar model	HALP	0.998(0.995-1.000)	0.0418
Fitting by two-piecewise linear model
	Inflection point of HALP	40.06
		0.980(0.972-0.989)	<0.001
		0.999(0.997-1.001)	0.4749
	Log likelihood ratio		<0.001
male
Fitting by standard lincar model	HALP	0.996(0.994-0.999)	0.0118
Fitting by two-piecewise linear model
	Inflection point of HALP	50.76
	HALP < 40.06	0.980(0.973-0.988)	<0.001
	HALP ≥ 40.06	0.999(0.996-1.001)	0.2648
	Log likelihood ratio		<0.001
female
Fitting by standard lincar model	HALP	1.001(0.997-1.004)	0.7059
Fitting by two-piecewise linear model
	Inflection point of HALP	38.21
	HALP < 38.21	0.987(0.976-0.997)	0.015
	HALP ≥ 38.21	1.003(0.999-1.007)	0.1008
	Log likelihood ratio		0.009
CVD-related mortality
model
Fitting by standard lincar model	HALP	0.996(0.992-0.999)	0.0183
Fitting by two-piecewise linear model
	Inflection point of HALP	45.44
	HALP < 45.44	0.980(0.971-0.990)	<0.001
	HALP ≥ 45.44	0.998(0.996-1.001)	0.2039
	Log likelihood ratio		0.002
age≥64
Fitting by standard lincar model	HALP	0.996(0.992-1.000)	0.0375
Fitting by two-piecewise linear model
	Inflection point of HALP	45.55
	HALP < 45.55	0.974(0.963-0.985)	<0.001
	HALP ≥ 45.55	0.999(0.996-1.001)	0.3483
	Log likelihood ratio		<0.001
male
Fitting by standard lincar model	HALP	0.994(0.988-0.999)	0.0237
Fitting by two-piecewise linear model
	Inflection point of HALP	98.64
	HALP < 98.64	0.985(0.978-0.992)	<0.001
	HALP ≥ 98.64	0.999(0.996-1.002)	0.5156
	Log likelihood ratio		<0.001
Cerebrovascular-related mortality
age＜64
Fitting by standard lincar model	HALP	0.971(0.948-0.994)	0.0146
Fitting by two-piecewise linear model
	Inflection point of HALP	20.11
	HALP < 20.11	1.991(0.520-7.621)	0.3146
	HALP ≥ 20.11	0.995(0.927-0.985)	0.0034
	Log likelihood ratio		0.011
Data are presented as HR (hazard ratios), 95% CI (confidence intervals), and p value. HALP, hemoglobin, albumin, lymphocyte, and platele.

## Sheet: Supplementary Table 13-15
Supplementary Table 13—Subgroup analysis of association of HALP score with diabetic kidney disease among type 2 diabetes patients in Southwest China.(Considering the factors of the COVID-19 pandemic in the Southwest China)
Variables	Before COVID-19		After COVID-19
	OR (95% CI)	p for interaction	OR (95% CI)	p for interaction
Age		0.922		<0.001
<64	1.00(0.96,1.05)		0.97(0.94,1.00)
≥64	1.02(1.00,1.04)		0.95(0.92,0.98)
Sex		0.023		0.914
Female	0.73(0.65,0.81)		0.59(0.51,0.67)
Male	0.83(0.75,0.92)		0.57(0.51,0.63)
Drinking status		0.682		0.812
Never drinkers	0.74(0.67,0.80)		0.57(0.52,0.64)
Ever drinkers	0.90(0.78,1.03)		0.59(0.51,0.68)
Smoking status		0.079		0.366
Never smokers	0.74(0.68,0.81)		0.59(0.53,0.66)
Ever smokers	0.85(0.75,0.97)		0.56(0.49,0.64)
SBP		0.002		0.789
Normal	0.96(0.91,1.02)		1.00(0.92,1.09)
Abnormal	1.00(1.00,1.00)		1.02(1.01,1.03)
DBP		0.019		<0.001
Normal	0.98(0.94,1.02)		1.09(1.03,1.15)
Abnormal	1.00(1.00,1.00)		0.99(0.97,1.01)
Southwest China, a multi-center cross-sectional study in southwest China; SBP, systolic blood pressure; DBP, diastolic blood pressure.
Supplementary Table 14—Univariate logistics regression analysis of the association between HALP score and diabetic kidney disease among type 2 diabetes patients.(Considering the factors of the COVID-19 pandemic in the Southwest China)
Characteristic		Before COVID-19		After COVID-19
		OR(95%CI)	p value	OR(95%CI)	p value
Age		1.010(1.006-1.014)	<0.001	0.989(0.985-0.993)	<0.001
Sex		0.963(0.869-1.069)	0.482	1.221(1.089-1.370)	<0.001
Race
1		reference		reference
2		0.519(0.187-1.438)	0.207	1.573(0.747-3.314)	0.233
3		1.621(0.541-4.855)	0.388	1.812(0.511-6.429)	0.358
4		0.926(0.210-4.079)	0.919	0.906(0.094-8.716)	0.932
5		0.209(0.029-1.533)	0.124	1.463(0.762-2.810)	0.252
Drinking status		1.011(0.899-1.137)	0.854	1.109(0.982-1.254)	0.096
Smoking status		0.952(0.851-1.065)	0.39	1.139(1.013-1.280)	0.029
SBP		1.001(1.000-1.002)	0.007	1.004(1.001-1.007)	0.02
DBP		0.999(0.995-1.002)	0.377	0.997(0.991-1.002)	0.211
HGB		0.996(0.995-0.998)	<0.001	0.994(0.991-0.996)	<0.001
ALB		1.000(0.999-1.001)	0.705	0.916(0.906-0.926)	<0.001
LYM		0.991(0.940-1.044)	0.727	0.823(0.753-0.899)	<0.001
PLT		0.999(0.998-1.000)	0.02	1.003(1.002-1.003)	<0.001
HbA1c		0.994(0.990-0.997)	<0.001	1.096(1.071-1.122)	<0.001
WBC		1.000(1.000-1.000)	0.054	0.995(0.990-1.001)	0.083
SCR		1.000(1.000-1.001)	<0.001	1.000(1.000-1.000)	0.015
UA		1.002(1.001-1.002)	<0.001	1.002(1.002-1.003)	<0.001
TG		1.000(0.996-1.005)	0.956	1.014(0.995-1.034)	0.15
HDL-C		1.000(0.996-1.005)	0.914	0.619(0.559-0.684)	<0.001
LDL-C		1.001(0.997-1.005)	0.735	0.947(0.893-1.004)	0.068
EOS		1.435(1.071-1.923)	0.016	1.423(1.015-1.994)	0.041
NEU		1.015(0.998-1.033)	0.083	1.011(0.993-1.029)	0.231
MON		0.963(0.763-1.217)	0.754	0.918(0.708-1.192)	0.521
RBC		1.000(1.000-1.000)	0.339	1.001(0.999-1.002)	0.334
eGFR		0.980(0.974-0.986)	<0.001	0.961(0.954-0.968)	<0.001
HALP		0.999(0.999-1.000)	0.108	0.990(0.988-0.991)	<0.001
Note: OR, odds ratios; 95%CI, 95% confidence interval; Race(NHANES):1(Mexican American people), 2(other Hispanic people), 3(non-Hispanic White people), 4(non-Hispanic Black people) and 5(multi-racial people); Race(Southwest China):1(the Han ethnic group), 2(the Tujia ethnic group), 3(the Miao ethnic group), 4(the Hui ethnic group) and 5(other ethnic minorties); SBP, systolic blood pressure; DBP, …
Supplementary Table 15—Multivariable logistics regression analysis of the association between HALP score and diabetic kidney disease among type 2 diabetes patients.(Considering the factors of the COVID-19 pandemic in the Southwest China)
Before COVID-19
HALP Score	Model 1		Model 2		Model 3
	OR(95%CI)	p value	OR(95%CI)	p value	OR(95%CI)	p value
Q1	reference		reference		reference
Q2	0.587(0.520-0.662)	<0.001	0.601(0.532-0.678)	<0.001	0.594(0.522-0.676)	<0.001
Q3	0.639(0.556-0.735)	<0.001	0.666(0.578-0.767)	<0.001	0.650(0.550-0.767)	<0.001
After COVID-19
Q1	reference		reference		reference
Q2	0.555(0.486-0.635)	<0.001	0.524(0.457-0.600)	<0.001	0.669(0.566-0.790)	<0.001
Q3	0.340(0.287-0.403)	<0.001	0.307(0.258-0.365)	<0.001	0.748(0.561-0.997)	0.048
OR,odds ratios; 95% CI,95% confidence intervals; SBP, systolic blood pressure; HGB, hemoglobin; ALB, albumin; LYM, lymphocyte; PLT, platelet; HbA1c, glycated hemoglobin; SCR, serum creatinine; UA, uric acid; HDL-C, high-density lipoprotein cholesterol; EOS, eosinophile; MON, monocyte; RBC, red blood cell; HALP score, hemoglobin, albumin, lymphocyte, and platelet score.Divide patients into three g…
Before COVID-19 Model 1 adjusted for none. Model 2 adjusted for age and sex. Model 3 adjusted for age, sex, Smoking status, SBP, HGB, ALB, LYM, PLT, HbAlc, SCR, UA, HDL-C and EOS.
After COVID-19 Model 1 adjusted for none. Model 2 adjusted for age and sex. Model 3 adjusted for age, sex, SBP, HGB, PLT, HbAlc, SCR, UA and EOS.

[truncated: 5 more sheets: Supplementary Table 16-18, Supplementary Table 19-20, Supplementary Table 21-28, Supplementary Table 29-32, Supplementary Table 33]
